# Supplementary material for: Survey on Non-Human Primates and Mosquitoes Does not Provide Evidences of Spillover/Spillback between the Urban and Sylvatic Cycles of Yellow Fever and Zika Viruses Following Severe Outbreaks in Southeast Brazil
Source: MDPI journal article supplement (doi:10.3390/v12040364), 2020-03-26
Supplement: s1 [file s1]

**Table S1:** List of viruses and serotypes tested by high throughput real time PCR

|                                   |
|-----------------------------------|
| Bussuquara                        |
| Cache Valley                      |
| California encephalitis 1         |
| California encephalitis 2         |
| Chikungunya                       |
| Chikungunya_ECSA                  |
| Chikungunya Asia                  |
| Chikungunya IndECSA               |
| Chikungunya Wafr                  |
| Dengue 1                          |
| Dengue 2                          |
| Dengue 3                          |
| Dengue 4                          |
| East equine encephalitis 1        |
| East equine encephalitis 2        |
| West equine encephalitis B1       |
| West equine encephalitis B2       |
| Venezuelan equine encephalitis 1  |
| Venezuelan equine encephalitis 2  |
| Venezuelan equine encephalitis 3  |
| Venezuelan equine encephalitis 4  |
| Venezuelan equine encephalitis 5  |
| Venezuelan equine encephalitis 6  |
| Venezuelan equine encephalitis 7  |
| Venezuelan equine encephalitis 8  |
| Venezuelan equine encephalitis 9  |
| Venezuelan equine encephalitis 10 |
| Venezuelan equine encephalitis 11 |
| Venezuelan equine encephalitis 12 |
| Venezuelan equine encephalitis 13 |
| Group C                           |
| Apeu                              |
| Caraparu 1                        |
| Caraparu 2                        |

|                  |
|------------------|
| Guama 1          |
| Guama 2          |
| Guama 3          |
| Guama 4          |
| Guama 5          |
| Guaroa S1        |
| Guaroa S2        |
| Guaroa S3        |
| Ilhéus           |
| Jamestown Canyon |
| Jurona           |
| Keystone         |
| La crosse 1      |
| La crosse 2      |
| La crosse 3      |
| La crosse 4      |
| La crosse 5      |
| La crosse 6      |
| La crosse 7      |
| La crosse 8      |
| Mayaro 1         |
| Mayaro 2         |
| Oropouche        |
| Rocio            |
| Sindbis 2-3      |
| Sindbis 1        |
| Sindbis 4        |
| Sindbis 5        |
| Sindbis 6        |
| Snowshoe Hare    |
| Saint Louis      |
| Tacaiuma         |
| Trivittatus      |
| Una 1            |

|                    |
|--------------------|
| West Nile 2.1      |
| West Nile 2.2      |
| West Nile 3        |
| West Nile 4        |
| Yellow Fever AC_AE |
| Yellow Fever SA1   |
| Yellow Fever SA2   |
| Yellow Fever WA1   |
| Yellow Fever WA3   |
| Yellow Fever WA4   |
| Zika 2             |
| Zika 4             |
| Zika 6             |
| Zika 7             |
| Zika 8             |

|          |
|----------|
| Itaqui   |
| Marituba |
| Murutucu |
| Nepuyo   |
| Oriboca  |
| Restan   |

|                     |
|---------------------|
| <b>Una 2</b>        |
| <b>Una 3</b>        |
| <b>Una 4</b>        |
| <b>West Nile 1A</b> |
| <b>West Nile 1B</b> |
| <b>West Nile 1C</b> |
